# Supplementary material for: Achievement of Low-Density Lipoprotein Cholesterol Targets in Cardiac Rehabilitation: Impact of the 2019 ESC/EAS Dyslipidaemia Guidelines
Source: MDPI journal article supplement (doi:10.3390/jcm11237057), 2022-11-29
Supplement: s1 [file s1]

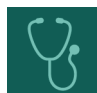

## Supplementary Material

**Suppl. Table S1.** Therapy at CR entry stratified after discharge time period.

|                                | <b>Group A</b> | <b>Group B</b> | <b>p</b>          |
|--------------------------------|----------------|----------------|-------------------|
|                                | <b>[593]</b>   | <b>[282]</b>   |                   |
| Statins                        | 569 (96)       | 273 (97)       | 0.67              |
| High potent Statins            | 545 (96)       | 270 (99)       | <b>0.020</b>      |
| Statins and Ezetimibe          | 36 (6)         | 50 (18)        | <b>&lt;0.001*</b> |
| Statin Dose                    |                |                | <b>&lt;0.001*</b> |
| 12.5 %MDD                      | 9 (2)          | 1 (0)          | 0.18              |
| 25 %MDD                        | 53 (9)         | 27 (10)        | 0.89              |
| 50 %MDD                        | 440 (77)       | 198 (73)       | 0.14              |
| 75 %MDD                        | 1 (0)          | 2 (1)          | 0.25              |
| 100 %MDD                       | 62 (11)        | 44 (16)        | <b>0.044*</b>     |
| ...≥50% MDD                    | 503 (85)       | 244 (87)       | 0.81              |
| Statin associated symptoms (%) | 0 (0)          | 5 (2)          | <b>0.0035*</b>    |
| Ezetimibe (%)                  | 38 (6)         | 52 (18)        | <b>&lt;0.001*</b> |
| PCSK9-Inhib. (%)               | 2 (0)          | 4 (1)          | 0.089             |

Categorical and interval scaled variables are described as n with %; Indication for significance= p Overall: 0.05 (indicated by bold letters and \*); MDD: Maximum of daily dose. MDD: maximal daily dose. 40mg Rosuvastatin and 80 mg Atorvastatin is defined as 100% MDD.

**Supple Table S2.** Therapy at CR discharge stratified after discharge time period.

|                                | <b>Group A</b> | <b>Group B</b> | <b>p</b>          |
|--------------------------------|----------------|----------------|-------------------|
|                                | <b>[593]</b>   | <b>[282]</b>   |                   |
| Statins                        | 575 (97)       | 277 (98)       | 0.37              |
| High potent Statins            | 555 (96)       | 272 (98)       | 0.34              |
| Statins and Ezetimibe          | 103 (17)       | 145 (51)       | <b>&lt;0.001*</b> |
| Statin Dose                    |                |                | <b>&lt;0.001*</b> |
| 12.5 %MDD                      | 15 (3)         | 4 (1)          | 0.33              |
| 25 %MDD                        | 83 (14)        | 28 (10)        | 0.094             |
| 50 %MDD                        | 422 (74)       | 188 (68)       | 0.088             |
| 75 %MDD                        | 1 (0)          | 2 (1)          | 0.25              |
| 100 %MDD                       | 51 (9)         | 55 (20)        | <b>&lt;0.001*</b> |
| ...≥50% MDD                    | 474 (80)       | 245 (87)       | <b>0.046</b>      |
| Statin associated symptoms (%) | 9 (2)          | 17 (6)         | <b>&lt;0.001*</b> |
| Ezetimibe (%)                  | 105 (18)       | 145 (51)       | <b>&lt;0.001*</b> |
| PCSK9-Inhib. (%)               | 3 (1)          | 5 (2)          | 0.12              |

Categorical and interval scaled variables are described as n with %; Indication for significance= p Overall: 0.05 (indicated by bold letters and \*); MDD: Maximum of daily dose. 40mg Rosuvastatin and 80 mg Atorvastatin is defined as 100% MDD.

**Supple Table S3.** Logistic Regression Weights for Statin dosage at CR discharge.

|                  | <b>Coefficient/Estimate</b> | <b>95% Confidence Interval</b> | <b>p</b>          |
|------------------|-----------------------------|--------------------------------|-------------------|
| <b>Intercept</b> | -7.5                        | [-10.9, -4.1]                  | <b>&lt;0.001*</b> |
| Age              | 0.0091                      | [-0.018, 0.036]                | 0.51              |
| Male Sex         | -0.067                      | [-0.79, 0.66]                  | 0.86              |
| Hypertension     | 0.57                        | [-0.12, 1.2]                   | 0.10              |
| Dyslipidaemia    | 1.8                         | [0.89, 2.8]                    | <b>&lt;0.001*</b> |
| Smoking History  | 0.066                       | [-0.56, 0.69]                  | 0.84              |

|                                          |        |                 |               |
|------------------------------------------|--------|-----------------|---------------|
| Therapy PCI                              | 2.0    | [-0.024, 4.0]   | 0.053         |
| Therapy CABG                             | 2.0    | [-0.062, 4.2]   | 0.057         |
| Group B                                  | 0.65   | [0.074, 1.2]    | <b>0.027*</b> |
| Rehabilitation Duration                  | 0.0027 | [-0.012, 0.017] | 0.72          |
| Family History for Cardiovascular Events | 0.059  | [-0.52, 0.64]   | 0.84          |

Multivariate quantile regression model identifying factors associated with statin dosage at CR discharge. Positive coefficients/estimates indicate a positive correlation between above mentioned independent factors and statin dosage at CR discharge. Indication for significance= p Overall: 0.05 (indicated by bold letters and \*). CABG: Coronary artery bypass surgery; PCI: Percutaneous coronary intervention.

**Supple Table S4.** Logistic Regression Weights for new Ezetimibe prescription at CR discharge.

|                                          | Coefficient/Estimate | 95% Confidence Interval | p                 |
|------------------------------------------|----------------------|-------------------------|-------------------|
| <b>Intercept</b>                         | -1.83                | [-3.5, -0.18]           | <b>0.030</b>      |
| Age                                      | -0.0080              | [-0.025, 0.0092]        | 0.36              |
| Male Sex                                 | -0.40                | [-0.85, 0.044]          | 0.077             |
| Hypertension                             | 0.13                 | [-0.27, 0.54]           | 0.51              |
| Dyslipidaemia                            | 0.66                 | [0.24, 1.1]             | <b>0.0018*</b>    |
| Smoking History                          | 0.50                 | [0.082, 0.91]           | <b>0.019*</b>     |
| Therapy PCI                              | -0.16                | [-0.78, 0.46]           | 0.61              |
| Therapy CABG                             | -0.041               | [-0.80, 0.71]           | 0.91              |
| Group B                                  | 1.3                  | [0.90, 1.6]             | <b>&lt;0.001*</b> |
| Rehabilitation Duration                  | -0.0010              | [-0.0084, 0.0064]       | 0.79              |
| Family History for Cardiovascular Events | 0.13                 | [-0.25, 0.50]           | 0.51              |

Multivariate quantile regression model identifying factors associated with ezetimibe prescription at CR discharge. Positive coefficients/estimates indicate a positive correlation between above mentioned independent factors and ezetimibe prescription at CR discharge. Indication for significance= p Overall: 0.05 (indicated by bold letters and \*). CABG: Coronary artery bypass surgery; PCI: Percutaneous coronary intervention.

## Flowchart of patient enrolment

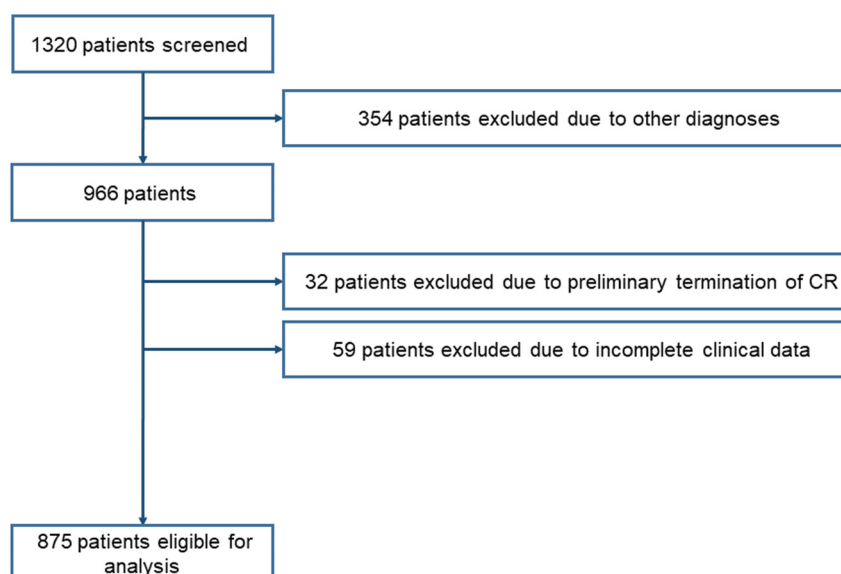

**Supple Figure S1.** Flowchart of patient enrolment.

LDL-C distribution at CR entry and discharge referencing the ESC/EAS 2016 and 2019 guideline targets

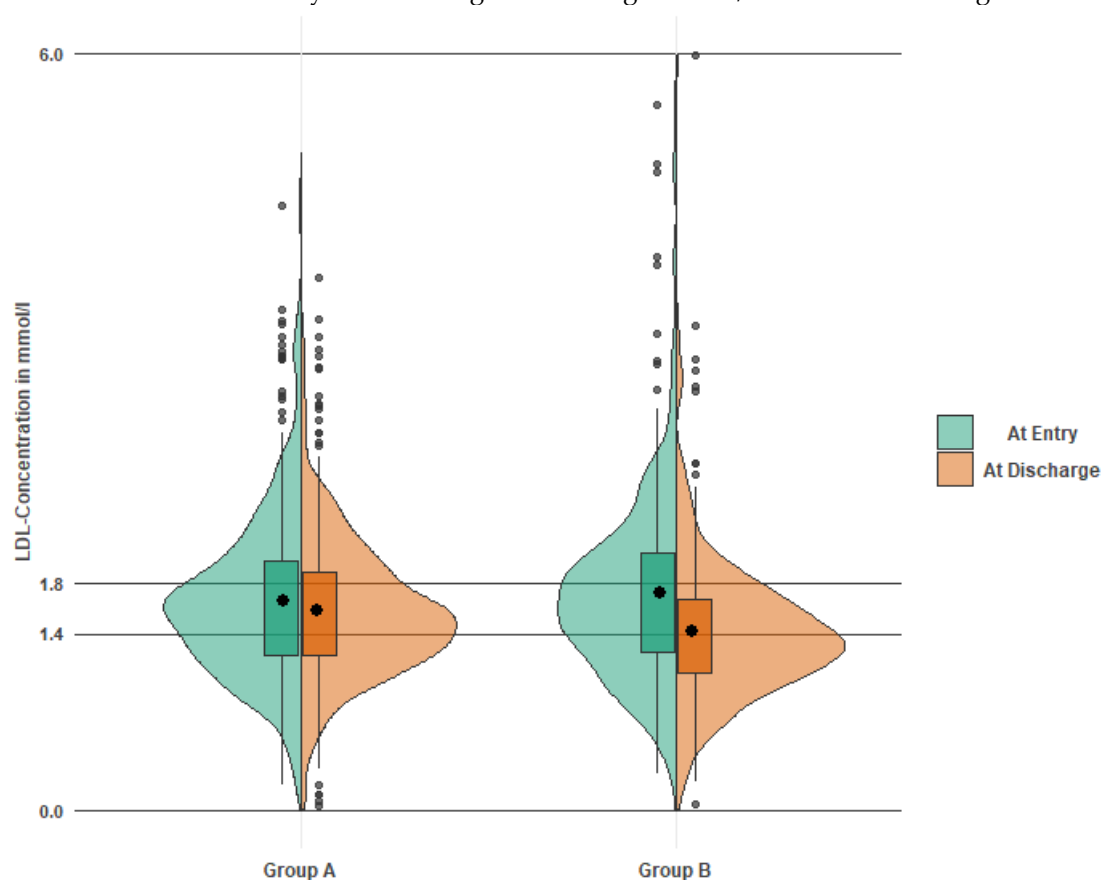

**Supple Figure S2.** LDL-C distribution at CR baseline and discharge in the entire cohort, group A and group B shown in split violin plot referencing the ESC/EAS 2016 and 2019 guideline targets. The boxes represent the first to third quartile, the black point shows the median. The vertical lines represent the 95<sup>th</sup> percentile, the small points show outliers.
